# Supplementary material for: Deactivation and regeneration of a benchmark Pt/C catalyst toward oxygen reduction reaction in the presence of poisonous SO2 and NO
Source: Royal Society of Chemistry journal article supplement (doi:10.1039/d2cy00141a), 2022-01-01
Supplement: d2cy00141a1.pdf [file d2cy00141a1.pdf]

## Supporting Information

### **The Deactivation and Regeneration of Benchmark Pt/C Catalyst toward Oxygen Reduction Reaction in Presence of Poisonous SO<sub>2</sub> and NO**

Yu-Xin Liu,<sup>‡a</sup> Wei-Yi Zhang,<sup>‡b</sup> Guo-Kang Han,<sup>a</sup> Ya-Wei Zhou,<sup>b</sup> Ling-Feng Li,<sup>a</sup> Cong  
Kang,<sup>a</sup> Fan-Peng Kong,<sup>a</sup> Yun-Zhi Gao,<sup>a</sup> Chun-Yu Du,<sup>a</sup> Jia-Jun Wang,<sup>a</sup> Yu-Lin Ma,<sup>a</sup> Lei  
Du,<sup>\*a</sup> Wen-Bin Cai,<sup>\*b</sup> Ge-Ping Yin<sup>\*a</sup>

<sup>a</sup> *School of Chemistry and Chemical Engineering, Harbin Institute of Technology, 92  
West Dazhi St., Harbin 150001, China*

*E-mail: yingeping@hit.edu.cn (Prof. G. Yin); lei.du@gzhu.edu.cn (Dr. L. Du)*

<sup>b</sup> *Shanghai Key Laboratory of Molecular Catalysis and Innovative Materials,  
Collaborative Innovation Center of Chemistry for Energy Materials, Department of  
Chemistry, Fudan University, Shanghai, 200438, China*

*E-mail: wbcai@fudan.edu.cn (Prof. W.-B. Cai)*

<sup>‡</sup> These authors contributed equally to this work.

This file includes the follow content:

**Experimental Section**

**Supplementary Figures S1-S6**

**Supplementary Tables S1**

**References**

## Experimental Section

**Chemicals and materials.** Perchloric acid ( $\text{HClO}_4$ , Aladdin, analytically pure), commercial Pt/C catalyst (20 wt%, Johnson Matthey Corp, Vulcan carbon XC-72, product code: Hispec 3000, analytically pure), anhydrous sodium sulfite ( $\text{Na}_2\text{SO}_3$ , Dupont, analytically pure), sodium nitrite ( $\text{NaNO}_2$ , Dupont, analytically pure), 5.0 wt% Nafion aqueous solution (Dupont) were purchased and used without further purification. Deionized water ( $18.2 \text{ M}\Omega \text{ cm}$ , Mill-Q Corp.) was used in all the experiments.

**Electrochemical measurements.** All the electrochemical measurements were conducted in a three-electrode system equipped with a Pine AFMSRX disk rotator and an electrochemical workstation (CH Instruments Inc.) at room temperature ( $25^\circ \text{C}$ ). A Pt foil and Ag/AgCl electrode were used as the counter and reference electrodes, respectively. The catalyst ink was prepared by ultrasonically dispersing 12 mg of the catalyst in the solvent containing 9 mL water, 3 mL isopropanol alcohol and 12  $\mu\text{L}$  Nafion (5 wt%). The ratio of ionomer-to-catalyst is 1:21.7. The working electrode was prepared by dropping 10  $\mu\text{L}$  of the catalyst ink onto a glassy carbon rotating disk electrode (RDE) (geometric area:  $\sim 0.196 \text{ cm}^2$ ) followed by drying it at room temperature in air to yield a smooth thin film that covered the entire electrode surface. The ORR kinetic current density of catalyst was calculated according to Koutecky-Levich equation, as shown in equation. S1

$$\frac{1}{i} = \frac{1}{i_k} + \frac{1}{i_d} \quad (\text{S1})$$

where  $i$ ,  $i_k$  and  $i_d$  represent the current of apparent current density, kinetic current

density and limited diffusion current density, respectively.

The procedures to complete the SO<sub>2</sub> adsorption (poisoning) on Pt surfaces were reported in our previous publication.<sup>1</sup> There is an equilibrium between SO<sub>3</sub><sup>2-</sup> and SO<sub>2</sub> in sulfur dioxide stock solution (0.1 M Na<sub>2</sub>SO<sub>3</sub> + 0.1 M HClO<sub>4</sub>); the equilibrium equations are

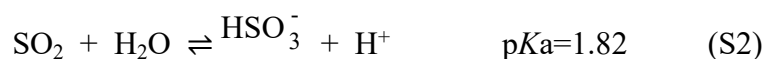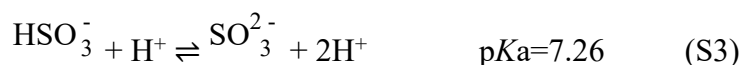

According to the chemical equilibrium constants, it can be calculated that, in 0.1 M HClO<sub>4</sub> electrolyte, the concentration of SO<sub>2</sub> is millions of times that of SO<sub>3</sub><sup>2-</sup>. Therefore, the primary S-containing species are SO<sub>2</sub> molecules, so that the actual concentration of the SO<sub>2</sub> can be calculated on the basis of the total amount of S(IV) initially dissolved in the stock solution. Then the stock solution was diluted to different concentrations by deoxygenated 0.1 M HClO<sub>4</sub> electrolyte and homogenized by bubbling Ar. The Pt/C catalyst was poisoned by holding the electrode at 0.65 V in the 1 mM Na<sub>2</sub>SO<sub>3</sub> + 0.1M HClO<sub>4</sub> electrolyte for 1 min, which was denoted as s-Pt/C.

The NO-poisoned Pt/C was prepared by a similar method and denoted as n-Pt/C, i.e., holding the electrode at 0.65 V in the 1 mM NaNO<sub>2</sub> + 0.1 M HClO<sub>4</sub> electrolyte for 1 min.<sup>2, 3</sup> Pt electrode immersed in acidic NaNO<sub>2</sub> solution can catalyze the following reactions S4-5, resulting in the formation of NO adsorption layer on the electrode surface. This method has been widely used to pre-adsorb NO monolayer on Pt group metal surfaces.<sup>4</sup>

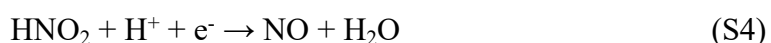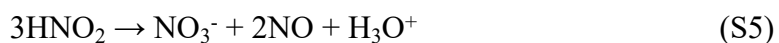

For the SO<sub>2</sub> and NO coadsorption experiment, the electrode was held at 0.65 V in a

mixed electrolyte consisting of  $\text{Na}_2\text{SO}_3$ ,  $\text{NaNO}_2$  and 0.1M  $\text{HClO}_4$  for 1 min. The concentration of  $\text{Na}_2\text{SO}_3$  was fixed as 1 mM while that of  $\text{NaNO}_2$  was  $x$  times of  $\text{Na}_2\text{SO}_3$ . The corresponding electrode was denoted as  $\text{s}_{1\text{n}_x}\text{-Pt/C}$ . The poisoned Pt/C electrodes were then rinsed with water and immersed into fresh 0.1 M  $\text{HClO}_4$  electrolyte for further tests. All the potentials were reported with respect to the reversible hydrogen electrode (RHE) in this work. The potential of Ag/AgCl electrode vs. RHE was determined by a two-electrode system where Ag/AgCl electrode was used as the working electrode, the platinum plate with saturated hydrogen (i.e., RHE) was used as the counter and reference electrode.

***In-situ* ATR-SEIRAS.** A Nicolet iS50 FT-IR spectrometer equipped with a liquid nitrogen-cooled MCT detector was used for *in-situ* SEIRAS measurements and was operated at an incident angle of ca.  $65^\circ$  with the optical accessory developed by Shanghai Yuanfang Technology Co. Ltd. A Pt film electrodeposited on Au/Si was used as the working electrode, which was reported in details previously.<sup>5</sup> An SCE and a Pt mesh were used as the reference and counter electrodes, respectively. Real-time spectra were collected during the potential sweep at  $5 \text{ mV s}^{-1}$  at a resolution of  $4 \text{ cm}^{-1}$ . All of the spectra in this paper are shown in absorbance units defined as  $-\log(I/I_0)$ , where  $I$  and  $I_0$  represent the intensities of the reflected radiation of the sample and reference spectra, respectively. All of the experiments were performed at room temperature.

**Transmission electron microscopy (TEM).** TEM images were taken on an FEI Tecnai G2F30 with an acceleration voltage of 300 kV.

**Computational method.** The modeling and theoretical simulation were carried out

using Density Functional Theory (DFT) with a plane-wave based pseudopotential formalism. Exchange correlation effects were described self-consistently using the generalized gradient approximation (GGA-PBE). Bulk platinum was established based on a face-centered cubic structure with a lattice parameter of 3.97Å. 4\*4 supercells were constructed to avoid adsorptive molecular interactions. Pt(111) surface was separated from its periodic images by a vacuum space of 15 Å. We used a plane-wave cutoff energy of 300 eV and a  $(8 \times 8 \times 1)$  Monkhorst-Pack mesh of k points to sample the Pt(111). The adsorption energy of SO<sub>2</sub> was calculated as

$$E_{\text{ads}} = - \left( E_{\text{SO}_2 - \text{Pt}(111)} - E_{\text{Pt}(111)} - E_{\text{SO}_2} \right) \quad (1)$$

where  $E_{\text{SO}_2 - \text{Pt}(111)}$ ,  $E_{\text{Pt}(111)}$ ,  $E_{\text{SO}_2}$  are the energies of the SO<sub>2</sub> molecule adsorbed on the Pt(111) surface, the Pt(111) surface, and the SO<sub>2</sub> molecule in the gas phase, respectively.

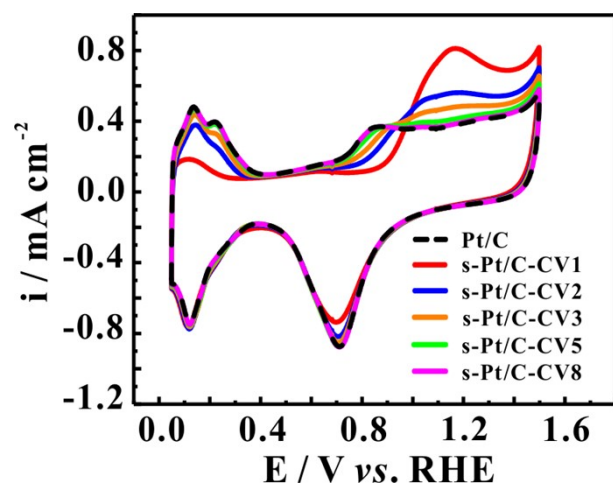

Figure S1 CV curves of a fresh Pt/C and an s-Pt/C in an Ar-saturated 0.1 M  $\text{HClO}_4$  solution at a scan rate of  $50 \text{ mV s}^{-1}$ .

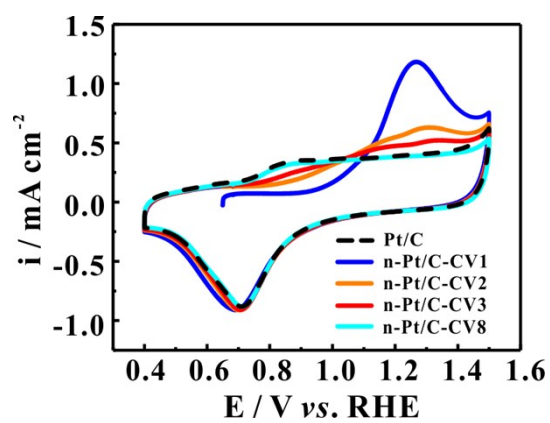

Figure S2 CV curves of fresh Pt/C and n-Pt/C catalysts in Ar-saturated 0.1 M HClO<sub>4</sub> solution at a scan rate of 50 mV s<sup>-1</sup>: the potential scan procedure is 0.65 V→1.5 V→0.4 V.

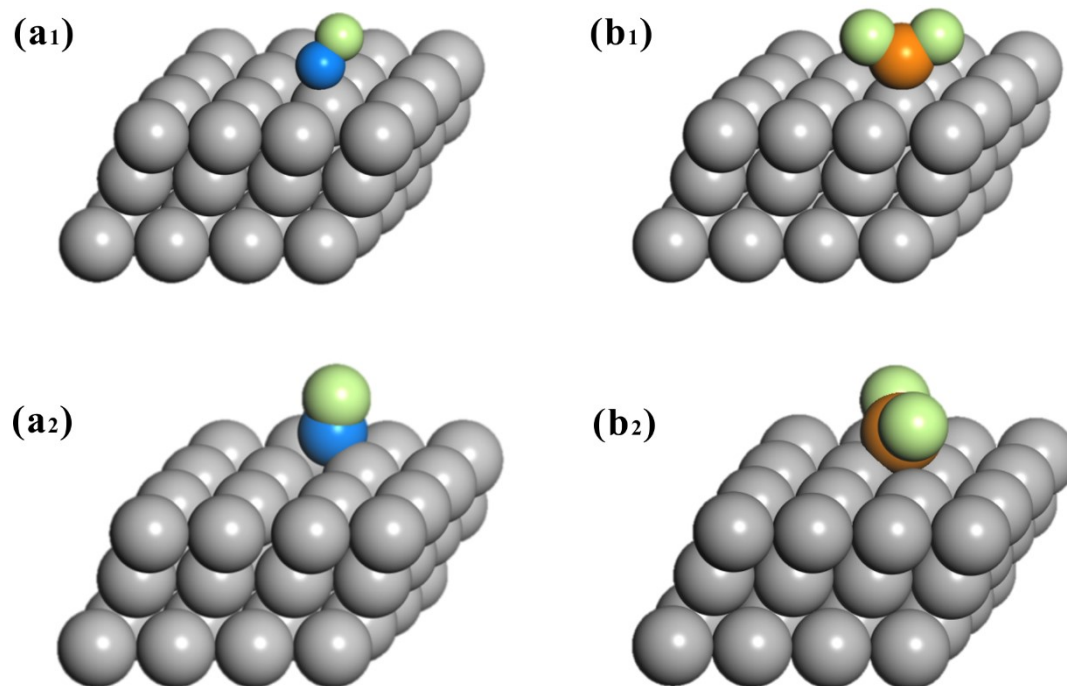

Figure S3 Diagrams of Pt(111) surface shown with two adsorption structures for SO<sub>2</sub> and NO, where a, b correspond to the atop site and bridge site. Gray, yellow, blue and green balls represent Pt, S, N and O atoms, respectively (The ball size does not represent the actual atomic size).

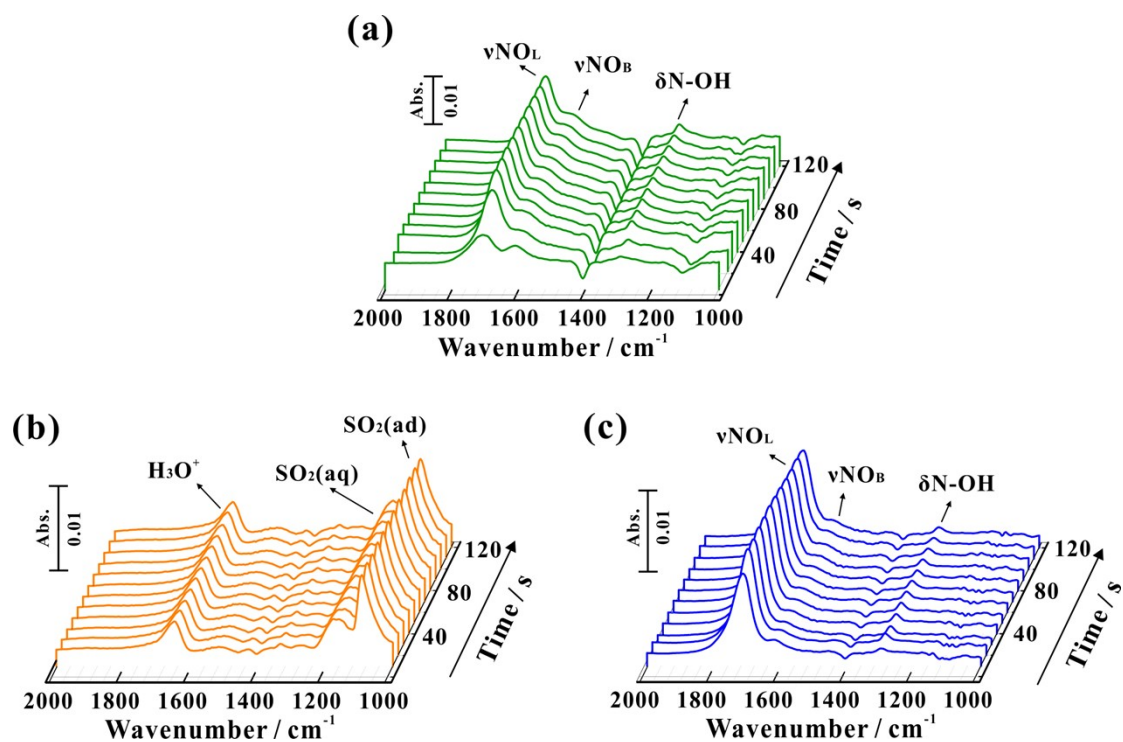

Figure S4 *In situ* ATR-SEIRA spectra of polycrystalline Pt electrode at 0.65 V in (a) 0.1 M  $\text{HClO}_4$  + 1mM  $\text{Na}_2\text{SO}_3$  + 3mM  $\text{NaNO}_2$ ; (b) 0.1 M  $\text{HClO}_4$  + 1mM  $\text{Na}_2\text{SO}_3$  and (c) 0.1 M  $\text{HClO}_4$  + 1mM  $\text{NaNO}_2$  solution. The reference spectrums were taken at 0.65 V in 0.1 M  $\text{HClO}_4$ .

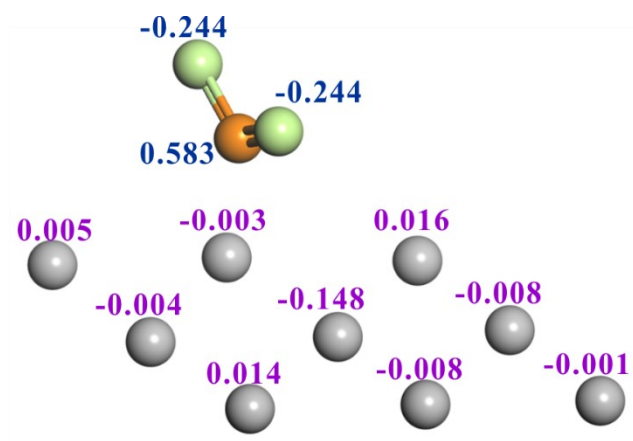

Figure S5 Charge distribution for SO<sub>2</sub>/Pt(111) (The ball size does not represent the actual atomic size).

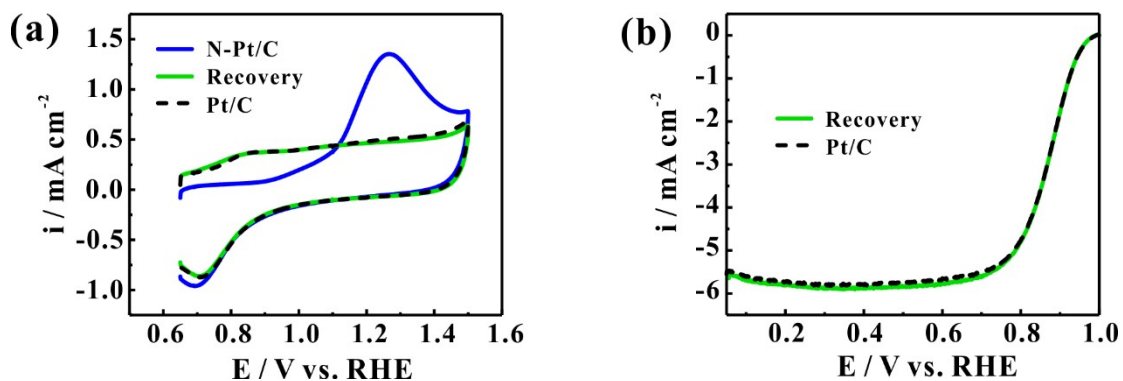

Figure S6 (a) CV curves of fresh Pt/C, n-Pt/C and n-Pt/C after potentiostatic at 0.2 V for 5 s (Recovery) in Ar-saturated 0.1 M HClO<sub>4</sub> solution at a scan rate of 50 mV s<sup>-1</sup>: the potential scan procedure is 0.65 V→1.5 V→0.65 V; (b) LSV curves of fresh Pt/C and N-Pt/C after potentiostatic at 0.2 V for 5 s (Recovery) (scan rate:10 mV s<sup>-1</sup>) in O<sub>2</sub>-saturated 0.1 M HClO<sub>4</sub> solution at a rotation rate of 1600 rpm.

**Table S1. IR Peak Assignments in this work**

| Wavenumber (cm <sup>-1</sup> ) | Assignment                                                                         |
|--------------------------------|------------------------------------------------------------------------------------|
| ~1710                          | Linear-bonded NO (NO <sub>L</sub> ) on Pt(111) <sup>2, 6</sup>                     |
| ~1630                          | Bridge-bonded NO (NO <sub>B</sub> ) on Pt(100) <sup>2, 6</sup>                     |
| ~1610                          | δ(HOH) of interfacial water <sup>6, 7</sup>                                        |
| ~1285                          | δ(N–OH) bending of adsorbed HNO <sub>2</sub> <sup>9</sup>                          |
| ~1460                          | δN–H mode of dissolved NH <sub>4</sub> <sup>+</sup> <sup>2, 10</sup>               |
| ~1330                          | Asymmetric N–O stretching of NO <sub>3</sub> <sup>-</sup> in solution <sup>2</sup> |
| ~1091                          | S–O stretching of adsorbed SO <sub>2</sub> <sup>11-13</sup>                        |
| ~1170                          | Symmetric S–O stretching of SO <sub>2</sub> in solution <sup>11-13</sup>           |
| ~1650                          | Interfacial hydronium (H <sub>3</sub> O <sup>+</sup> ) <sup>7</sup>                |

### Supplementary References

1. Y. Liu, L. Du, F. Kong, G. Han, Y. Gao, C. Du, P. Zuo, G. Yin, *ACS Sustain. Chem. Eng.*, 2019, **8**, 1295-1301.
2. A. Rodes, V. Climent, J. Orts, J. Perez, A. Aldaz, *Electrochim. Acta*, 1998, **44**, 1077-1090.
3. Y. Yan, B. Huang, J. Wang, H. Wang, W. Cai, *J. Catal.*, 2007, **249**, 311-317.
- 4 M. Chen, C. Du, J. Zhang, P. Wang, T Zhu. *J. Power Sources*, 2011, **196**, 620-626.
5. Y.-G. Yan, Q.-X. Li, S.-J. Huo, M. Ma, W.-B. Cai, M. Osawa, *J. Phys. Chem. B*, 2005, **109**, 7900-7906.
6. K. Nakata, A. Okubo, K. Shimazu, A. Yamakata, S. Ye, M. Osawa, *Langmuir*, 2008,

**24**, 4352-4357.

7. Y.-W. Zhou, Y.-F. Chen, K. Jiang, Z. Liu, Z.-J. Mao, W.-Y. Zhang, W.-F. Lin, W.-B. Cai, *Appl. Catal. B*, 2021, **280**, 119393.
8. T. Iwasita, *Electrochim. Acta*, 2002, **47**, 3663-3674.
9. B. Alvarez, A. Rodes, J. Perez, J. Feliu, J. Rodriguez, E. Pastor, *Langmuir*, 2000, **16**, 4695-4705.
10. J. Gootzen, *Trav. Chim. JR Neth. Chem.*, 1996, **115**, 480.
11. T. Iwasita, F. Nart, *Wiley Online Library*, 1995, pp. 123.
12. C. Korzeniewski, W. McKenna, S. Pons, *J. Electroanal. Chem.*, 1987, **235**, 361-368.
13. C. Quijada, A. Rodes, J. Vazquez, J. Perez, A. Aldaz, *J. Electroanal. Chem.*, 1995, **394**, 217-227.
